# Supplementary material
Source: PubMed Central journal article supplement (PMC9526451)
Supplement: NIHMS1838247-supplement-Supplementary_Material_1.pdf [file NIHMS1838247-supplement-Supplementary_Material_1.pdf]

# This is Our Lane: The Surgeon's Role in Social Justice Advocacy

Catherine J Hunter, M.D.

Principal Investigator

University of Oklahoma Health Sciences Center

This is a research study. Research studies involve only people who choose to participate. You have been identified to take this survey as a surgeon or surgeon in training. Results will be used to determine what surgeons think about social justice and advocacy.

Please know that completion of the survey is both completely voluntary and anonymous. Completion of this survey will take approximately 5-10 minutes. No personal identifiers are collected and the investigators will not make any attempt to identify you. Your responses will not be shared with anyone at your institution.

There will be no foreseeable risks or immediate benefits to participating. Taking part in this study will not cost you anything. You may stop your participation at any time without negative consequences. You may choose not to take the survey. Your opportunity to complete your training (if you are a resident or fellow) or your position as a faculty member will not be affected in any way by your choice whether to participate in the study or not. If you choose to participate, your consent is implied by completion of the survey.

If you have questions about this study, please contact Heather Liebe, M.D. at [heather-liebe@ouhsc.edu](mailto:heather-liebe@ouhsc.edu). For questions about your rights as a research subject, contact the OUHSC Director of the Human Research Participant Protection Program at 405-271-2045.

Thank you!

---

What hospital are you affiliated with?

- Geisinger Medical Center
- Oklahoma University Medical Center
- Ochsner Medical Center

AGE

- 20
- 21
- 22
- 23
- 24
- 25
- 26
- 27
- 28
- 29
- 30
- 31
- 32
- 33
- 34
- 35
- 36
- 37
- 38
- 39
- 40
- 41
- 42
- 43
- 44
- 45
- 46
- 47
- 48
- 49
- 50
- 51
- 52
- 53
- 54
- 55
- 56
- 57
- 58
- 59
- 60
- 61
- 62
- 63
- 64
- 65
- 66
- 67
- 68
- 69
- 70
- 71
- 72
- 73
- 74
- 75
- 76
- 77
- 78
- 79
- 80
- 81
- 82
- 83
- 84
- 85
- 86
- 87
- 88

- 89
- 90

---

Gender

- Male
- Female
- Other (specify below)
- Prefer not to answer

---

OTHER gender

---

---

I identify my ethnicity as (check all that apply)

- American Indian or Alaska Native
- Asian
- Black or African American
- Hispanic, Latino or Spanish
- Native Hawaiian or Pacific Islander
- White
- Other (specify below)
- Prefer not to answer

---

OTHER ethnicity

---

---

Surgical sub-specialty

- Breast
- Cardiac
- Colon and Rectal
- General
- Pediatric
- Plastic
- Surgical Oncology
- Thoracic
- Trauma
- Vascular

---

Training Level

- Resident
- Fellow
- Faculty

---

Resident PGY year

- PGY 1
- PGY 2
- PGY 3
- PGY 4
- PGY 5
- Research

---

FACULTY years in practice

- 1
- 2
- 3
- 4
- 5
- 6
- 7
- 8
- 9
- 10
- 11
- 12
- 13
- 14
- 15
- 16
- 17
- 18
- 19
- 20
- 21
- 22
- 23
- 24
- 25
- 26
- 27
- 28
- 29
- 30
- 31
- 32
- 33
- 34
- 35
- 36
- 37
- 38
- 39
- 40
- 41
- 42
- 43
- 44
- 45
- 46
- 47
- 48
- 49
- 50

---

Do you think that individual surgeons should be involved in social justice movements in a professional capacity?

- Yes
- No

---

Do you think that surgical societies (such as American College of Surgeons, etc) should be involved in social justice movements?

- Yes
- No

---

Have you participated in education or training sessions about social justice and/or advocacy?

- Yes
- No

Which have you participated in? (check all that apply)

- Formal class
- Online training
- Lecture/seminar
- Other (specify below)

OTHER type of class (specify)

---

In the past 2 years, have you personally: (check all that apply)

- Attended an organized protest, march or demonstration of any kind?
- Posted on social media in support or opposition to a movement of any kind (e.g. Me Too, Black Lives Matter, gun rights, I look like a surgeon, etc)?
- Joined or participated in a group on social media in support or opposition of a movement?
- Changed your profile picture to show support for a cause?
- Used hashtags related to a social issue?
- Brought up social justice movements at work?
- Given financially to a social justice movement?
- None

If you checked any box above, did you identify as a surgeon and/or did those you participated with know you were a surgeon?

- Yes
- No

What social justice issue is most important to you? (select one)

- Sexual violence
- Anti-racism
- Gun control or gun rights
- Gender equality
- LGBTQ+ rights
- Indigenous rights
- Immigration reform
- None
- Other (specify below)

OTHER main issue important to you (specify)

---

Which (if any) of the following social justice issues have you ever participated in? (check all that apply)

- #MeToo or other sexual violence movements
- Black Lives Matter or other anti-racism initiatives
- This is Our Lane, #MarchForOurLives or other gun control or gun rights
- #HeForShe, #LookLikeASurgeon or other gender equality initiatives
- LGBTQ+ rights
- Indigenous rights
- #DREAMers or other immigration reform initiatives
- None
- Other (specify below)

OTHER social justice issues you've participated in (specify)

---

Which of the social justice issues (if any) do you feel surgeons should be involved in? (check all that apply)

- Sexual violence
- Anti-racism
- Gun control or gun rights
- Gender equality
- LGBTQ+ rights
- Indigenous rights
- Immigration reform
- None
- Other (specify below)

OTHER social justice issues you feel surgeons should be involved in

---

What type of advocacy work do you think is appropriate (if any) for surgeons to be involved in a professional setting? (check all that apply)

- Attending or organizing protests, marches or demonstrations
- Posting/engaging on social media in support or opposition to a movement (e.g. me too, Black Lives Matter, gun rights, I look like a surgeon, etc)
- Discussing social justice movements at work
- Signing petitions
- Giving presentations/lectures on social justice movements
- Meeting with community leaders, policy makers, etc related to social justice movements
- Working directly with individuals/communities/populations affected by social justice movements
- Giving financially to social justice movements
- None
- Other(specify below)

OTHER type of advocacy work you think is appropriate for surgeons to be involved in a professional setting

---

Do you feel that any types of advocacy are INAPPROPRIATE for surgeons to be engaged in? (Check all that apply)

- Attending or organizing protests, marches or demonstrations
- Posting/engaging on social media in support or opposition to a movement (e.g. me too, Black Lives Matter, gun rights, I look like a surgeon, etc)
- Discussion social justice movements at work
- Signing petitions
- Giving presentations/lectures on social justice movements
- Meeting with community leaders, policy makers, etc related to social justice movements
- Working directly with individuals/communities/populations affected by social justice movements
- Giving financially to social justice movements
- None
- Other (specify below)

OTHER types of advocacy you feel is INAPPROPRIATE for surgeons to engage in

---

WHY do you feel these types of advocacies are INAPPROPRIATE for surgeons to engage in?

---

---

What type of advocacy work do you think is appropriate (if any) for surgical societies to be involved in? (check all that apply)

- Attending or organizing protests, marches or demonstrations
- Posting/engaging on social media in support or opposition to a movement (e.g. me too, Black Lives Matter, gun rights, I look like a surgeon, etc)
- Giving presentations/lectures on social justice movements
- Meeting with community leaders, policy makers, etc related to social justice movements
- Working directly with individuals/communities/populations affected by social justice movements
- Giving financially to social justice movements
- None
- Other (specify below)

---

OTHER types of advocacy work you think is appropriate for surgical societies to be involved in

---

---

Do you feel that any types of advocacy are INAPPROPRIATE for surgical societies to be engaged in? (check all that apply)

- Attending or organizing protests, marches or demonstrations
- Posting/engaging on social media in support or opposition to a movement (e.g. me too, Black Lives Matter, gun rights, I look like a surgeon, etc)
- Giving presentations/lectures on social justice movements
- Meeting with community leaders, policy makers, etc related to social justice movements
- Working directly with individuals/communities/populations affected by social justice movements
- Giving financially to social justice movements
- None
- Other (specify below)

---

OTHER types of advocacy you think are INAPPROPRIATE for surgical societies to be involved in.

---

---

WHY do you feel these types of advocacies are INAPPROPRIATE for surgical societies to be involved in?

---
